# Supplementary material for: The phi027 Bacteriophage Influences Physiology and Virulence of the Lysogenic Strain of <em>Clostridioides difficile</em>
Source: Preprints.org preprint supplement (doi:10.20944/preprints202410.0063.v1), 2024-10-03
Supplement: Supplementary file 2 [file supplementary]

**Table S2.** Primers used in this study.

| Primers       | Sequences (5'-3')                                                        |
|---------------|--------------------------------------------------------------------------|
| CDHmyoF       | TATACCAGAGCAGTTRCTRA                                                     |
| CDHmyoR       | CMTCCTTCAAYTGTTTGTA                                                      |
| CDHsipoF      | TTATGCGCTTTGCTRTTYAA                                                     |
| CDHsipoR      | MGTTTTATTGCTCCCATT                                                       |
| phiCDKH02_1F  | CATTCATATGATACTAGT                                                       |
| phiCDKH02_1R  | GTAGATTATGCTAATTC                                                        |
| phiCDKH02_2F  | TTCTCTTCTCGTAATTGTTG                                                     |
| phiCDKH02_2R  | ACTTCTTTCTTCATGTTCTTC                                                    |
| phiCDKH02_3F  | TTATTTGGAGGTATTCATGG                                                     |
| phiCDKH02_3R  | CTCTTATTTGTCCTTCCAG                                                      |
| YW3105        | AAAGTAAAAGAAGAAAATAGAAATATAATCTTTAATTTGAAAAGATTTA                        |
| phi500_S1_0   | ATTATAATACGGTGGCAAATGGGTGGCATCTACAAGAGTAGAAATTAATGGTGGAATGATAAGGGTT      |
| phi500_S1S2_0 | ATTAGACTTAGCAAATGGTGTTGCTGAATCTACAAGAGTAGAAATTATAATACGGTGGCAAATGGGTGGC   |
| phi500_S1_1   | AGATGCCACCCATTTGCCACCGTATTATAATTTCTACTCTTGTAGATTTTAGTGATAGAGTGATAAGTAAAA |
| phi500_S1S2_1 | GATTCAGCAACACCATTTGCTAAGTCTAATTTCTACTCTTGTAGATTTTAGTGATAGAGTGATAAGTAAAA  |
| phi500_S1_2   | ATTATTATTTACTTAAGTTGTAATATTTACTTAAGTTGTAATACTATT                         |
| phi500_S1_3   | AATAGTATTACAACCTAAGTAAATATATTACAACCTAAGTAAATAATAAT                       |
| phi500_S1_4   | CTCCATGGACGCGTGACGTCGACTCATTCCAACCTATACCAGTTTATAGGA                      |

---

|              |                                   |
|--------------|-----------------------------------|
| ilvB_Cdiff-F | YTGGTAATGTAGATAAAAATGTRG          |
| cotG_Cdiff-R | AATCTTCTGTA ACTCCAAAATC           |
| edit-F       | GACCCATCTGAAATAAGTAAAAATATAG      |
| integrase-R  | TATAGCTAGCATGAAAGGTGGAGTAAGAAAAAG |

---
