# Supplementary material for: The phi027 Bacteriophage Influences Physiology and Virulence of the Lysogenic Strain of <em>Clostridioides difficile</em>
Source: Preprints.org preprint supplement (doi:10.20944/preprints202410.0063.v1), 2024-10-03
Supplement: Supplementary file 3 [file supplementary]

500/12 93622-ATTTAGAATAGTATTACAACCTTAAGTAAATAT-**phi027**-GAATAATATTACAACCTTAAGTAAATAAATTTTGAA-149638  
|||||  
CKH08 ATTTAGAATAGTATTACAACCTTAAGTAAATAT-----ATTACAACCTTAAGTAAATAAATTTTGAA

**Figure S1.** Sanger sequencing of phi027 prophage deletion region in the genome of CKH08 strain. Coordinates marked at the genomic sequence of the strain 500/12 provided according to the sequence JBCJLD000000000.
