# Supplementary material for: The phi027 Bacteriophage Influences Physiology and Virulence of the Lysogenic Strain of <em>Clostridioides difficile</em>
Source: Preprints.org preprint supplement (doi:10.20944/preprints202410.0063.v1), 2024-10-03
Supplement: Supplementary file 4 [file supplementary]

**Table S1.** Bacterial strains and plasmids used in this study.

| Strains and Plasmids |                                                                                                                                           | Relevant characteristics |                | Reference or source | Accession no    |
|----------------------|-------------------------------------------------------------------------------------------------------------------------------------------|--------------------------|----------------|---------------------|-----------------|
| Strains              |                                                                                                                                           |                          |                |                     |                 |
| <i>E. coli</i>       |                                                                                                                                           |                          |                |                     |                 |
| DH5α                 | <i>F- gyrA96 recA1 relA1 endA1 thi-1 hsdR17 glnV44 deoR D (lacZYA-argF) U169[f80dD(lacZ)M15]</i>                                          |                          |                | [1]                 |                 |
| sExpress             | NEB Express (R702): <i>fhuA2 [lon] ompT gal sulA11 R(mcr-73::miniTn10--TetS)2 [dcm] R(zgb-210::Tn10--TetS) endA1 Δ(mcrC-mrr)114::IS10</i> |                          |                | [2]                 |                 |
| <i>C. difficile</i>  |                                                                                                                                           |                          |                |                     |                 |
|                      |                                                                                                                                           | Ribotype                 | Isolation date |                     |                 |
| 500/12               | Clinical strain                                                                                                                           | 176                      | 2012           | MUW <sup>a</sup>    | JBCJLD000000000 |
| CKH08                | Derived from 500/12, Δ <i>phi027</i>                                                                                                      |                          |                | This work           |                 |
| 137/12               | Clinical strain                                                                                                                           | 027                      | 2012           | MUW                 | JBCJLK000000000 |
| 1974/12              | Clinical strain                                                                                                                           | 176                      | 2012           | MUW                 | JBCJLI000000000 |
| 2163/12              | Clinical strain                                                                                                                           | 027                      | 2012           | MUW                 | JBCJLH000000000 |
| 2282/12              | Clinical strain                                                                                                                           | 027                      | 2012           | MUW                 | JBCJLG000000000 |
| 3136/12              | Clinical strain                                                                                                                           | 176                      | 2012           | MUW                 | JBCJLF000000000 |
| 3290/12              | Clinical strain                                                                                                                           | 176                      | 2012           | MUW                 | JBCJLM000000000 |
| 700/13               | Clinical strain                                                                                                                           | 027                      | 2013           | MUW                 | JBCJLJ000000000 |
| OR/03/B              | Clinical strain                                                                                                                           | 027                      | 2022           | MUW                 | JBCJLL000000000 |
| KB/04/B              | Clinical strain                                                                                                                           | 027                      | 2022           | MUW                 | JBCJLE000000000 |
| WL/14/B              | Clinical strain                                                                                                                           | 027                      | 2022           | MUW                 | JBCJLR000000000 |

|          |                 |     |      |                  |                 |
|----------|-----------------|-----|------|------------------|-----------------|
| SL/15/Ba | Clinical strain | 027 | 2023 | MUW              | JBCJLN000000000 |
| BM/25/D  | Clinical strain | 027 | 2022 | MUG <sup>b</sup> | JBCJLO000000000 |
| AA/01/By | Clinical strain | 027 | 2022 | MUS <sup>c</sup> | JBCJLQ000000000 |
| SM/02/By | Clinical strain | 027 | 2022 | MUS              | JBCJLP000000000 |

### Plasmids

|          |                                                                                                                                                                                                                           |  |  |           |  |
|----------|---------------------------------------------------------------------------------------------------------------------------------------------------------------------------------------------------------------------------|--|--|-----------|--|
| pUC19    | <i>ori(pMB1) lacZ Amp<sup>R</sup></i>                                                                                                                                                                                     |  |  | [3]       |  |
| pEcCdH01 | Derived from pUC19, <i>sRNAP::crRNA</i> (23-nt repeat), PCR template for generating <i>sRNAP::crRNA</i> for retargeting                                                                                                   |  |  | This work |  |
| pWH34    | Derived from pMTL82151, <i>E. coli</i> - <i>C. difficile</i> shuttle vector, <i>iLacP::AsCpf1</i> , BtgZI-BtgZI double sites, “Chassis” plasmid for gene-targeting plasmid construction, Cm <sup>R</sup> /Tm <sup>R</sup> |  |  | [4]       |  |
| pEcCdH07 | Derived from pWH34, targeting <i>phi027</i> with one spacer, Cm <sup>R</sup> /Tm <sup>R</sup>                                                                                                                             |  |  | This work |  |
| pEcCdH08 | Derived from pWH34, targeting <i>phi027</i> with two sets of spacers, Cm <sup>R</sup> /Tm <sup>R</sup>                                                                                                                    |  |  | This work |  |

<sup>a</sup>University Clinical Center, Medical University of Warsaw, Poland

<sup>b</sup>University Clinical Center, Medical University of Gdańsk, Poland

<sup>c</sup>Pulmonology and Thoracic Surgery Center in Bystra, Medical University of Silesia, Poland

### References

- [1] Woodcock DM, Crowther PJ, Doherty J, Jefferson S, DeCruz E, Noyer-Weidner M, Smith SS, Michael MZ, Graham MW. Quantitative evaluation of *Escherichia coli* host strains for tolerance to cytosine methylation in plasmid and phage recombinants. *Nucleic Acids Res.* 1989, 17:3469-78.
- [2] Woods C, Humphreys CM, Rodrigues RM, Ingle P, Rowe P, Henstra AM, Köpke M, Simpson SD, Winzer K, Minton NP. A novel conjugal donor strain for improved DNA transfer into *Clostridium* spp. *Anaerobe* 2019, 59:184-191.
- [3] Yanisch-Perron C, Vieira J, Messing J. Improved M13 phage cloning vectors and host strains: nucleotide sequences of the M13mp18 and pUC19 vectors. *Gene* 1985, 33:103-19.

- [4] Hong W, Zhang J, Cui G, Wang L, Wang Y. Multiplexed CRISPR-Cpf1-Mediated Genome Editing in *Clostridium difficile* toward the Understanding of Pathogenesis of C. difficile Infection. ACS Synth Biol 2018, 7:1588-1600.
